# Supplementary material
Source: Research Square preprint supplement (doi:10.21203/rs.3.rs-10188908/v1)
Supplement: Supplementary file 1 [file 02743a42f0397ea28257eaca.docx]

**Figure 1.** Study sample selection flowchart

**
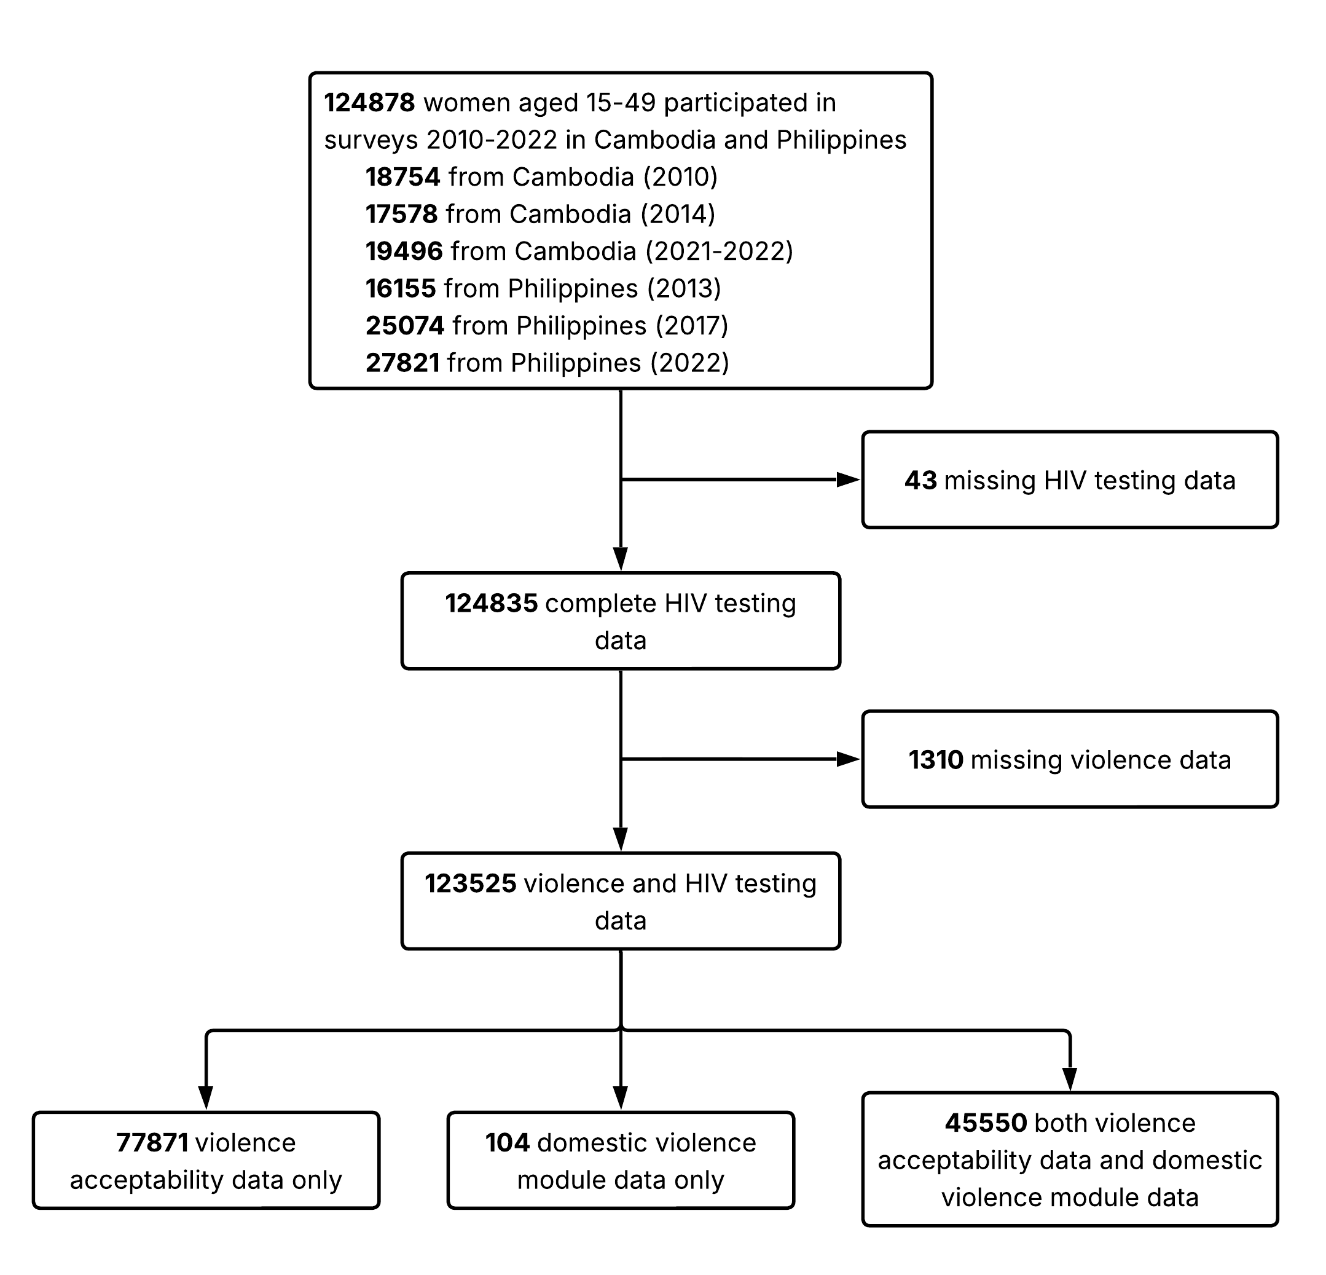
**

**Table 1.** Experiences of all forms of violence and attitudes towards violence among women aged 15–49 in the Philippines and Cambodia, overall and by country

| **Violence exposure** | **Philippines, n (%)** | **Cambodia, n (%)** | **Overall, n (%)** |
| --- | --- | --- | --- |
| Experienced any violence |  |  |  |
| Yes | 8,272 (23.0%) | 2,298 (23.7%) | 10,570 (23.2%) |
| No | 27,686 (77.0%) | 7,398 (76.3%) | 35,084 (76.8%) |
| Experienced any emotional violence |  |  |  |
| Yes | 7085 (19.7%) | 2036 (21.0%) | 9121 (20.0%) |
| No | 28872 (80.3%) | 7660 (79.0%) | 36532 (80.0%) |
| Experienced any physical violence |  |  |  |
| Severe physical violence | 1431 (4.0%) | 411 (4.2%) | 1842 (4.0%) |
| Less severe physical violence | 2088 (5.8%) | 706 (7.3%) | 2794 (6.1%) |
| No physical violence | 32433 (90.2%) | 8579 (88.5%) | 41012 (89.8%) |
| Experienced any sexual violence |  |  |  |
| Yes | 1385 (3.9%) | 332 (3.4%) | 1717 (3.8%) |
| No | 34571 (96.1%) | 9364 (96.6%) | 43935 (96.2%) |
| Wife beating justified: any reason |  |  |  |
| Yes | 8,113 (11.9%) | 24,269 (44.0%) | 32,382 (26.2%) |
| No | 6,0190 (88.1%) | 30,849 (56.0%) | 91,039 (73.8%) |
| Wife beating justified: goes out without telling husband |  |  |  |
| Yes | 2657 (3.9%) | 15126 (27.9%) | 17783 (14.6%) |
| No | 65291 (96.1%) | 39053 (72.1%) | 104344 (85.4%) |
| Wife beating justified: neglects children |  |  |  |
| Yes | 6272 (9.3%) | 20830 (38.2%) | 27102 (22.2%) |
| No | 61519 (90.7%) | 33638 (61.8%) | 95157 (77.8%) |
| Wife beating justified: argues with husband |  |  |  |
| Yes | 1898 (2.8%) | 11688 (21.6%) | 13586 (11.1%) |
| No | 65881 (97.2%) | 42443 (78.4%) | 108324 (88.9%) |
| Wife beating justified: refuses sex with husband |  |  |  |
| Yes | 1064 (1.6%) | 6516 (12.3%) | 7580 (6.3%) |
| No | 66509 (98.4%) | 46597 (87.7%) | 113106 (93.7%) |
| Wife beating justified: burns the food |  |  |  |
| Yes | 1002 (1.5%) | 6395 (11.7%) | 7397 (6.0%) |
| No | 67075 (98.5%) | 48259 (88.3%) | 115334 (94.0%) |
| Can respondent refuse husband sex |  |  |  |
| Yes | 27195 (89.9%) | 33237 (91.9%) | 60432 (91.0%) |
| No | 3044 (10.1%) | 2943 (8.1%) | 5987 (9.0%) |

**Table 2.** Association between attitudes to violence and HIV testing among women aged 15–49 in the Philippines, by marital status

| **Violence type** | **Currently married** | | | | **Never married** | | | | **Formerly married** | | | |
| --- | --- | --- | --- | --- | --- | --- | --- | --- | --- | --- | --- | --- |
|  | **Exposed, n** | **HIV tested, n (%)** | **OR (95% CI)** | **aOR (95% CI)** | **Exposed, n** | **HIV tested, n (%)** | **OR (95% CI)** | **aOR (95% CI)** | **Exposed, n** | **HIV tested, n (%)** | **OR (95% CI)** | **aOR (95% CI)** |
| Wife beating justified: any reason |  |  |  |  |  |  |  |  |  |  |  |  |
| No | 35757 | 2365 (6.6%) | ref. | ref. | 22131 | 508 (2.3%) | ref. | ref. | 2302 | 177 (7.7%) | ref. | ref. |
| Yes | 5014 | 282 (5.6%) | 0.84 (0.74–0.95) | 0.99 (0.86–1.13) | 2755 | 52 (1.9%) | 0.82 (0.61–1.08) | 1.01 (0.74–1.34) | 344 | 26 (7.6%) | 0.98 (0.63–1.48) | 1.05 (0.65–1.61) |
| Wife beating justified: argues with husband |  |  |  |  |  |  |  |  |  |  |  |  |
| No | 39430 | 2574 (6.5%) | ref. | ref. | 23902 | 550 (2.3%) | ref. | ref. | 2549 | 196 (7.7%) | ref. | ref. |
| Yes | 1153 | 64 (5.6%) | 0.84 (0.65–1.08) | 0.95 (0.72–1.24) | 661 | 6 (0.9%) | 0.39 (0.15–0.80) | 0.47 (0.18–0.96) | 84 | 5 (6.0%) | 0.76 (0.26–1.72) | 0.93 (0.32–2.15) |
| Wife beating justified: burns the food |  |  |  |  |  |  |  |  |  |  |  |  |
| No | 40142 | 2627 (6.5%) | ref. | ref. | 24327 | 555 (2.3%) | ref. | ref. | 2606 | 201 (7.7%) | ref. | ref. |
| Yes | 583 | 17 (2.9%) | 0.43 (0.25–0.67) | 0.61 (0.36–0.96) | 380 | 4 (1.1%) | 0.46 (0.14–1.07) | 0.64 (0.20–1.53) | 39 | 2 (5.1%) | 0.65 (0.10–2.13) | 0.45 (0.02–2.17) |
| Wife beating justified: neglects children |  |  |  |  |  |  |  |  |  |  |  |  |
| No | 36691 | 2422 (6.6%) | ref. | ref. | 22449 | 516 (2.3%) | ref. | ref. | 2379 | 184 (7.7%) | ref. | ref. |
| Yes | 3871 | 219 (5.7%) | 0.85 (0.73–0.98) | 1.01 (0.87–1.17) | 2141 | 41 (1.9%) | 0.83 (0.59–1.13) | 1.01 (0.71–1.38) | 260 | 18 (6.9%) | 0.89 (0.52–1.43) | 0.93 (0.54–1.52) |
| Wife beating justified: goes out without telling husband |  |  |  |  |  |  |  |  |  |  |  |  |
| No | 38839 | 2582 (6.6%) | ref. | ref. | 23933 | 553 (2.3%) | ref. | ref. | 2519 | 196 (7.8%) | ref. | ref. |
| Yes | 1792 | 57 (3.2%) | 0.46 (0.35–0.60) | 0.63 (0.47–0.83) | 748 | 6 (0.8%) | 0.34 (0.14–0.70) | 0.56 (0.22–1.16) | 117 | 5 (4.3%) | 0.53 (0.19–1.18) | 0.78 (0.27–1.79) |
| Wife beating justified: refuses sex with husband |  |  |  |  |  |  |  |  |  |  |  |  |
| No | 39984 | 2603 (6.5%) | ref. | ref. | 23948 | 552 (2.3%) | ref. | ref. | 2577 | 200 (7.8%) | ref. | ref. |
| Yes | 665 | 34 (5.1%) | 0.77 (0.54–1.08) | 0.99 (0.68–1.40) | 336 | 5 (1.5%) | 0.64 (0.23–1.40) | 0.84 (0.30–1.86) | 63 | 3 (4.8%) | 0.59 (0.14–1.62) | 0.80 (0.19–2.24) |
| Can respondent refuse husband sex |  |  |  |  |  |  |  |  |  |  |  |  |
| No | 3047 | 127 (4.2%) | ref. | ref. | - | - | - | - | - | - | - | - |
| Yes | 27202 | 2258 (8.3%) | 2.08 (1.74–2.51) | 1.59 (1.32–1.92) |  |  |  |  |  |  |  |  |

**Table 3.** Association between attitudes to violence and HIV testing among women aged 15–49 in Cambodia, by marital status

| **Violence type** | **Currently married** | | | | **Never married** | | | | **Formerly married** | | | |
| --- | --- | --- | --- | --- | --- | --- | --- | --- | --- | --- | --- | --- |
|  | **Exposed, n** | **HIV tested, n (%)** | **OR (95% CI)** | **aOR (95% CI)** | **Exposed, n** | **HIV tested, n (%)** | **OR (95% CI)** | **aOR (95% CI)** | **Exposed, n** | **HIV tested, n (%)** | **OR (95% CI)** | **aOR (95% CI)** |
| Wife beating justified: any reason |  |  |  |  |  |  |  |  |  |  |  |  |
| No | 19658 | 10372 (52.8%) | ref. | ref. | 9202 | 771 (8.4%) | ref. | ref. | 1989 | 873 (43.9%) | ref. | ref. |
| Yes | 17111 | 7677 (44.9%) | 0.73 (0.70–0.76) | 0.83 (0.80–0.87) | 5514 | 398 (7.2%) | 0.85 (0.75–0.96) | 0.90 (0.79–1.03) | 1644 | 625 (38.0%) | 0.78 (0.69–0.90) | 0.86 (0.75–0.99) |
| Wife beating justified: argues with husband |  |  |  |  |  |  |  |  |  |  |  |  |
| No | 27853 | 14466 (51.9%) | ref. | ref. | 11840 | 1014 (8.6%) | ref. | ref. | 2750 | 1195 (43.5%) | ref. | ref. |
| Yes | 8455 | 3378 (40.0%) | 0.62 (0.59–0.65) | 0.71 (0.67–0.74) | 2410 | 141 (5.9%) | 0.66 (0.55–0.79) | 0.71 (0.59–0.85) | 823 | 282 (34.3%) | 0.68 (0.58–0.80) | 0.78 (0.65–0.92) |
| Wife beating justified: burns the food |  |  |  |  |  |  |  |  |  |  |  |  |
| No | 32034 | 16284 (50.8%) | ref. | ref. | 13115 | 1086 (8.3%) | ref. | ref. | 3110 | 1324 (42.6%) | ref. | ref. |
| Yes | 4504 | 1674 (37.2%) | 0.57 (0.54–0.61) | 0.67 (0.62–0.72) | 1395 | 78 (5.6%) | 0.66 (0.51–0.83) | 0.70 (0.55–0.88) | 496 | 165 (33.3%) | 0.67 (0.55–0.82) | 0.73 (0.59–0.90) |
| Wife beating justified: neglects children |  |  |  |  |  |  |  |  |  |  |  |  |
| No | 21735 | 11298 (52.0%) | ref. | ref. | 9716 | 816 (8.4%) | ref. | ref. | 2187 | 954 (43.6%) | ref. | ref. |
| Yes | 14736 | 6634 (45.0%) | 0.76 (0.73–0.79) | 0.85 (0.81–0.89) | 4686 | 339 (7.2%) | 0.85 (0.74–0.97) | 0.90 (0.78–1.03) | 1408 | 532 (37.8%) | 0.78 (0.68–0.90) | 0.85 (0.74–0.99) |
| Wife beating justified: goes out without telling husband |  |  |  |  |  |  |  |  |  |  |  |  |
| No | 25134 | 13128 (52.2%) | ref. | ref. | 11379 | 945 (8.3%) | ref. | ref. | 2540 | 1106 (43.5%) | ref. | ref. |
| Yes | 11169 | 4741 (42.4%) | 0.67 (0.64–0.71) | 0.77 (0.73–0.81) | 2923 | 207 (7.1%) | 0.84 (0.72–0.98) | 0.88 (0.75–1.04) | 1034 | 369 (35.7%) | 0.72 (0.62–0.84) | 0.79 (0.67–0.92) |
| Wife beating justified: refuses sex with husband |  |  |  |  |  |  |  |  |  |  |  |  |
| No | 31260 | 16026 (51.3%) | ref. | ref. | 12322 | 1062 (8.6%) | ref. | ref. | 3015 | 1309 (43.4%) | ref. | ref. |
| Yes | 4821 | 1739 (36.1%) | 0.54 (0.50–0.57) | 0.62 (0.58–0.66) | 1171 | 60 (5.1%) | 0.57 (0.43–0.74) | 0.63 (0.48–0.82) | 524 | 170 (32.4%) | 0.63 (0.51–0.76) | 0.70 (0.56–0.86) |
| Can respondent refuse husband sex |  |  |  |  |  |  |  |  |  |  |  |  |
| No | 2968 | 1012 (34.1%) | ref. | ref. | - | - | - | - | - | - | - | - |
| Yes | 33306 | 16916 (50.8%) | 1.99 (1.84–2.16) | 1.79 (1.64–1.95) |  |  |  |  |  |  |  |  |

**Table 4.** Association between experiences of violence and HIV testing among women aged 15–49 in the Philippines, by marital status

| **Violence type** | **Currently married** | | | | **Never married** | | | | **Formerly married** | | | |
| --- | --- | --- | --- | --- | --- | --- | --- | --- | --- | --- | --- | --- |
|  | **Exposed, n** | **HIV tested, n (%)** | **OR (95% CI)** | **aOR (95% CI)** | **Exposed, n** | **HIV tested, n (%)** | **OR (95% CI)** | **aOR (95% CI)** | **Exposed, n** | **HIV tested, n (%)** | **OR (95% CI)** | **aOR (95% CI)** |
| Experienced any violence |  |  |  |  |  |  |  |  |  |  |  |  |
| No | 25262 | 1641 (6.5%) | ref. | ref. | 1467 | 80 (5.5%) | ref. | ref. | 957 | 56 (5.9%) | ref. | ref. |
| Yes | 7174 | 444 (6.2%) | 0.95 (0.85–1.06) | 0.93 (0.83–1.03) | 213 | 23 (10.8%) | 2.10 (1.26–3.37) | 1.86 (1.09–3.05) | 885 | 88 (9.9%) | 1.78 (1.26–2.53) | 1.64 (1.15–2.35) |
| Experienced any emotional violence |  |  |  |  |  |  |  |  |  |  |  |  |
| No | 26351 | 1700 (6.5%) | ref. | ref. | 1490 | 85 (5.7%) | ref. | ref. | 1031 | 61 (5.9%) | ref. | ref. |
| Yes | 6084 | 385 (6.3%) | 0.98 (0.87–1.10) | 0.95 (0.84–1.07) | 190 | 18 (9.5%) | 1.73 (0.99–2.88) | 1.55 (0.87–2.65) | 811 | 83 (10.2%) | 1.81 (1.29–2.57) | 1.67 (1.17–2.39) |
| Experienced any physical violence |  |  |  |  |  |  |  |  |  |  |  |  |
| No | 29426 | 1896 (6.4%) | ref. | ref. | 1641 | 99 (6.0%) | ref. | ref. | 1366 | 97 (7.1%) | ref. | ref. |
| Less severe | 1847 | 111 (6.0%) | 0.93 (0.76–1.13) | 0.91 (0.74–1.11) | 24 | 2 (8.3%) | 1.42 (0.22–4.90) | 1.02 (0.16–3.80) | 217 | 21 (9.7%) | 1.40 (0.83–2.26) | 1.31 (0.77–2.16) |
| Severe | 1158 | 78 (6.7%) | 1.05 (0.82–1.32) | 1.07 (0.83–1.35) | 15 | 2 (13.3%) | 2.40 (0.37–8.83) | 1.47 (0.22–5.70) | 258 | 26 (10.1%) | 1.47 (0.91–2.28) | 1.42 (0.86–2.25) |
| Experienced any sexual violence |  |  |  |  |  |  |  |  |  |  |  |  |
| No | 31308 | 2018 (6.4%) | ref. | ref. | 1655 | 95 (5.7%) | ref. | ref. | 1608 | 112 (7.0%) | ref. | ref. |
| Yes | 1126 | 67 (6.0%) | 0.92 (0.71–1.17) | 0.91 (0.69–1.17) | 25 | 8 (32.0%) | 7.73 (3.09–17.85) | 6.74 (2.58–16.40) | 234 | 32 (13.7%) | 2.12 (1.37–3.18) | 2.05 (1.30–3.15) |

**Table 5.** Association between experiences of violence and HIV testing among women aged 15–49 in Cambodia, by marital status

| **Violence type** | **Currently married** | | | | **Never married** | | | | **Formerly married** | | | |
| --- | --- | --- | --- | --- | --- | --- | --- | --- | --- | --- | --- | --- |
|  | **Exposed, n** | **HIV tested, n (%)** | **OR (95% CI)** | **aOR (95% CI)** | **Exposed, n** | **HIV tested, n (%)** | **OR (95% CI)** | **aOR (95% CI)** | **Exposed, n** | **HIV tested, n (%)** | **OR (95% CI)** | **aOR (95% CI)** |
| Experienced any violence |  |  |  |  |  |  |  |  |  |  |  |  |
| No | 6851 | 4051 (59.1%) | ref. | ref. | 132 | 16 (12.1%) | ref. | ref. | 415 | 183 (44.1%) | ref. | ref. |
| Yes | 2006 | 996 (49.7%) | 0.68 (0.62–0.75) | 0.75 (0.67–0.84) | 10 | 3 (30.0%) | 3.11 (0.62–12.48) | 3.45 (0.56–18.17) | 282 | 152 (53.9%) | 1.48 (1.09–2.01) | 1.52 (1.09–2.11) |
| Experienced any emotional violence |  |  |  |  |  |  |  |  |  |  |  |  |
| No | 7085 | 4172 (58.9%) | ref. | ref. | 133 | 16 (12.0%) | ref. | ref. | 442 | 199 (45.0%) | ref. | ref. |
| Yes | 1772 | 875 (49.4%) | 0.68 (0.61–0.76) | 0.76 (0.68–0.85) | 9 | 3 (33.3%) | 3.66 (0.72–15.38) | 4.07 (0.64–23.68) | 255 | 136 (53.3%) | 1.40 (1.02–1.90) | 1.45 (1.04–2.03) |
| Experienced any physical violence |  |  |  |  |  |  |  |  |  |  |  |  |
| No | 7911 | 4594 (58.1%) | ref. | ref. | 139 | 18 (12.9%) | ref. | ref. | 529 | 247 (46.7%) | ref. | ref. |
| Less severe | 623 | 306 (49.1%) | 0.70 (0.59–0.82) | 0.72 (0.60–0.86) | 3 | 1 (33.3%) | 3.36 (0.15–36.86) | 3.68 (0.13–55.05) | 80 | 46 (57.5%) | 1.54 (0.96–2.50) | 1.49 (0.89–2.50) |
| Severe | 323 | 147 (45.5%) | 0.60 (0.48–0.75) | 0.77 (0.61–0.99) |  |  |  |  | 88 | 42 (47.7%) | 1.04 (0.66–1.64) | 0.99 (0.61–1.62) |
| Experienced any sexual violence |  |  |  |  |  |  |  |  |  |  |  |  |
| No | 8601 | 4920 (57.2%) | ref. | ref. | 141 | 18 (12.8%) | ref. | ref. | 622 | 297 (47.7%) | ref. | ref. |
| Yes | 256 | 127 (49.6%) | 0.74 (0.57–0.94) | 0.78 (0.60–1.02) | 1 | 1 (100.0%) | 39345054.55 (0.00–NA) | 285316336.71 (0.00–NA) | 75 | 38 (50.7%) | 1.12 (0.70–1.82) | 1.07 (0.64–1.79) |
