# Supplementary material
Source: Research Square preprint supplement (doi:10.21203/rs.3.rs-10188908/v1)
Supplement: Supplementary file 2 [file dbd0e18fea21cd7a61efbcfd.docx]

**Supplementary material**

Supplement to: BLINDED. Estimating the association between experiences of violence and HIV test uptake, and potential effect modification with marital status, among women aged 15 to 49 in Cambodia and the Philippines: a cross-sectional study of National Demographic and Health Survey data

**Supplementary Table 1.** Acceptability of violence questions

| **Classification of IPV based on partners’ behaviors** |
| --- |
| **Less severe physical violence** |
| Partners’ behavior |
| Push, shake or throw something at the respondent |
| Slap the respondent |
| Punch the respondent with a fist or with something that could hurt the respondent |
| Twist the respondent’s arm or pull the respondent’s hair |
| **Severe physical violence** |
| Partners’ behavior |
| Kick, drag or beat the respondent up |
| Try to choke or burn the respondent on purpose |
| Threaten or attack the respondent with a knife, gun or any other weapon |
| **Emotional violence** |
| Partners’ behavior |
| Say or do something to humiliate the respondent in front of others |
| Threaten the respondent or someone close to the respondent with harm |
| Insult the respondent or make the respondent feel bad about herself |
| **Sexual violence** |
| Partners’ behavior |
| Physically force the respondent to have sexual intercourses |
| Physically force the respondent to perform other sexual acts |
| Force the respondent with threats/other way to perform other sexual acts |
